# Supplementary material
Source: PubMed Central journal article supplement (PMC3192226)
Supplement: NIHMS304863-supplement-Supplementary_Table_1.pdf [file NIHMS304863-supplement-Supplementary_Table_1.pdf]

## **Supplementary Table 1**

MLO-Y4 cells were treated with 10 ng/ml FGF2 in the presence or absence of 20  $\mu$ M U0126. RNA was extracted 3 h and 8 h after the treatment and subjected to microarray analysis using Affymetrix Mouse Genome 430 2.0 Array. The average fold changes of two independent experiments are shown in the right two columns. The number of fold changes is against the control sample that was not treated with FGF2 or U0126.

Supplemental Table 1

| FGF2 3h treatment |               | average fold change |            | FGF2 3h treatment |               | average fold change |            |
|-------------------|---------------|---------------------|------------|-------------------|---------------|---------------------|------------|
| Probe ID          | Gene symbol   | FGF2                | FGF2+U0126 | Probe ID          | Gene symbol   | FGF2                | FGF2+U0126 |
| 1431936_a_at      | Neu2          | 22.034              | <2         | 1419431_at        | Ereg          | 3.145               | <2         |
| 1421134_at        | Areg          | 11.148              | 3.332      | 1449826_a_at      | Fgf2          | 3.138               | <2         |
| 1427682_a_at      | Egr2          | 7.066               | <2         | 1430726_at        | Rassf8        | 3.104               | <2         |
| 1450262_at        | Clcf1         | 6.997               | 2.275      | 1459981_s_at      | /// Rsbn1     | 3.060               | <2         |
| 1440342_at        | G530011O06Rik | 6.528               | <2         | 1455604_at        | Fzd5          | 3.046               | <2         |
| 1437271_at        | Clcf1         | 6.519               | 2.337      | 1426037_a_at      | Rgs16         | 3.044               | <2         |
| 1437199_at        | ---           | 6.233               | <2         | 1443163_at        | Slc39a2       | 3.041               | 2.017      |
| 1427683_at        | Egr2          | 5.802               | <2         | 1439104_at        | C230081A13Rik | 3.029               | <2         |
| 1415834_at        | Dusp6         | 5.755               | <2         | 1425351_at        | Srxn1         | 3.021               | <2         |
| 1421207_at        | Lif           | 5.641               | 3.103      | 1422179_at        | Gjb4          | 3.007               | <2         |
| 1441789_at        | ---           | 5.563               | <2         | 1419647_a_at      | Ier3          | 2.993               | 2.843      |
| 1418539_a_at      | Ptpr          | 5.513               | 2.408      | 1419083_at        | Tnfsf11       | 2.978               | <2         |
| 1418540_a_at      | Ptpr          | 5.475               | 2.190      | 1449131_s_at      | Cd1d1         | 2.976               | <2         |
| 1437270_a_at      | Clcf1         | 5.379               | 2.379      | 1428834_at        | Dusp4         | 2.898               | <2         |
| 1420352_at        | Prss22        | 5.155               | <2         | 1451538_at        | Sox9          | 2.850               | <2         |
| 1439667_at        | ---           | 4.709               | <2         | 1454737_at        | Dusp9         | 2.849               | <2         |
| 1436584_at        | Spry2         | 4.646               | <2         | 1434252_at        | Tmcc3         | 2.834               | <2         |
| 1443859_at        | /// Rsbn1     | 4.565               | <2         | 1454799_at        | Agpat9        | 2.823               | <2         |
| 1443394_at        | ---           | 4.413               | <2         | 1424880_at        | Trib1         | 2.804               | <2         |
| 1455000_at        | Gpr68         | 4.327               | <2         | 1455265_a_at      | Rgs16         | 2.789               | <2         |
| 1449982_at        | Il11          | 4.157               | <2         | 1437820_at        | Foxs1         | 2.773               | <2         |
| 1423933_a_at      | I600029D21Rik | 4.101               | <2         | 1442072_at        | C230081A13Rik | 2.702               | <2         |
| 1416200_at        | Il33          | 4.043               | <2         | 1442018_at        | Al426953      | 2.687               | 2.175      |
| 1446797_at        | A330075M08Rik | 4.026               | <2         | 1457823_at        | Cyr61         | 2.685               | 4.047      |
| 1458241_at        | ---           | 3.996               | <2         | 1435994_at        | Kcnh1         | 2.680               | <2         |
| 1434285_at        | Frmd4a        | 3.847               | <2         | 1437486_at        | Gprc5a        | 2.661               | <2         |
| 1434025_at        | ---           | 3.841               | <2         | 1452469_a_at      | Smtn          | 2.660               | <2         |
| 1438824_at        | Slc20a1       | 3.823               | 2.513      | 1435554_at        | Tmcc3         | 2.660               | <2         |
| 1418349_at        | Hbegf         | 3.803               | 2.058      | 1424950_at        | Sox9          | 2.657               | <2         |
| 1418350_at        | Hbegf         | 3.795               | 2.136      | 1442340_x_at      | Cyr61         | 2.652               | 4.031      |
| 1456344_at        | Tnc           | 3.690               | <2         | 1418687_at        | Arc           | 2.649               | <2         |
| 1435174_at        | /// Rsbn1     | 3.546               | <2         | 1436387_at        | C330006P03Rik | 2.635               | <2         |
| 1446196_at        | Hmga2         | 3.415               | <2         | 1434403_at        | Spred2        | 2.620               | <2         |
| 1421410_a_at      | Pstpip2       | 3.389               | <2         | 1416255_at        | Gja4          | 2.612               | <2         |
| 1436237_at        | Ttc9          | 3.381               | <2         | 1429350_at        | Eid3          | 2.609               | <2         |
| 1451021_a_at      | Klf5          | 3.360               | <2         | 1422134_at        | Fosb          | 2.604               | <2         |
| 1450698_at        | Dusp2         | 3.319               | <2         | 1443210_at        | 058736        | 2.581               | <2         |
| 1419675_at        | Ngf           | 3.283               | 2.680      | 1451798_at        | Il1rn         | 2.557               | <2         |
| 1424890_at        | Bnc1          | 3.268               | <2         | 1427313_at        | Ptgir         | 2.535               | <2         |
| 1417995_at        | Ptpn22        | 3.234               | <2         | 1435867_at        | Jhdm1d        | 2.486               | <2         |
| 1417065_at        | Egr1          | 3.176               | <2         | 1452161_at        | Tiparp        | 2.486               | 3.187      |
| 1455405_at        | Pstpip2       | 3.155               | <2         | 1457528_at        | Slc4a7        | 2.482               | <2         |
| 1436892_at        | Spred2        | 3.155               | <2         | 1433944_at        | Hectd2        | 2.482               | <2         |

| FGF2 3h treatment |               | average fold change |            | FGF2 3h treatment |               | average fold change |            |
|-------------------|---------------|---------------------|------------|-------------------|---------------|---------------------|------------|
| Probe ID          | Gene symbol   | FGF2                | FGF2+U0126 | Probe ID          | Gene symbol   | FGF2                | FGF2+U0126 |
| 1451680_at        | Srxn1         | 2.477               | <2         | 1419728_at        | Cxcl5         | 2.156               | <2         |
| 1449227_at        | Ch25h         | 2.467               | <2         | 1437626_at        | Zfp36l2       | 2.156               | <2         |
| 1459463_at        | ---           | 2.452               | <2         | 1429053_at        | 1110012J17Rik | 2.151               | <2         |
| 1460521_a_at      | Obfc2a        | 2.450               | 2.127      | 1455030_at        | Ptprj         | 2.146               | <2         |
| 1436329_at        | Egr3          | 2.444               | <2         | 1434082_at        | Pctk2         | 2.142               | <2         |
| 1428081_at        | Klhl21        | 2.439               | <2         | 1449893_a_at      | Lrig1         | 2.128               | <2         |
| 1455899_x_at      | Socs3         | 2.430               | <2         | 1419209_at        | Cxcl1         | 2.119               | <2         |
| 1450781_at        | Hmga2         | 2.412               | <2         | 1453698_at        | 6030451C04Rik | 2.111               | <2         |
| 1458802_at        | Hivep3        | 2.411               | <2         | 1416871_at        | Adam8         | 2.099               | <2         |
| 1420590_at        | Has1          | 2.410               | 3.257      | 1418507_s_at      | Socs2         | 2.092               | <2         |
| 1417612_at        | Ier5          | 2.400               | 2.069      | 1423161_s_at      | Spred1        | 2.071               | <2         |
| 1452160_at        | Tiparp        | 2.396               | 3.541      | 1452203_at        | Obfc2a        | 2.061               | <2         |
| 1435645_at        | Mmd           | 2.388               | <2         | 1434210_s_at      | Lrig1         | 2.058               | <2         |
| 1439797_at        | Ppard         | 2.380               | <2         | 1446212_at        | ---           | 2.043               | <2         |
| 1428909_at        | A130040M12Rik | 2.375               | <2         | 1436199_at        | Trim14        | -2.113              | > -2       |
| 1416273_at        | Tnfrsf2       | 2.371               | <2         | 1452244_at        | 6330406I15Rik | -2.138              | > -2       |
| 1459681_at        | ---           | 2.364               | <2         | 1437432_a_at      | Trim12        | -2.139              | > -2       |
| 1433110_at        | 5830474E16Rik | 2.344               | <2         | 1443964_at        | Tmie          | -2.176              | > -2       |
| 1416342_at        | Tnc           | 2.329               | <2         | 1428418_s_at      | 3110050N22Rik | -2.253              | > -2       |
| 1441228_at        | Apold1        | 2.325               | <2         | 1448390_a_at      | Dhrs3         | -2.258              | > -2       |
| 1426875_s_at      | Srxn1         | 2.324               | <2         | 1426937_at        | 6330406I15Rik | -2.325              | > -2       |
| 1433455_at        | /// Sh2b3     | 2.318               | <2         | 1440635_at        | Palll         | -2.343              | > -2       |
| 1434556_at        | ---           | 2.303               | <2         | 1438684_at        | Nuak1         | -2.355              | > -2       |
| 1417751_at        | Stk10         | 2.296               | <2         | 1416612_at        | Cyp1b1        | -2.440              | > -2       |
| 1426235_a_at      | Glul          | 2.293               | <2         | 1416926_at        | Trp53inp1     | -2.440              | > -2       |
| 1456112_at        | /// Tpr       | 2.288               | <2         | 1438211_s_at      | Dbp           | -2.448              | > -2       |
| 1443720_s_at      | Bmpr1b        | 2.285               | <2         | 1428417_at        | 3110050N22Rik | -2.455              | > -2       |
| 1426721_s_at      | Tiparp        | 2.280               | 3.015      | 1417234_at        | Mmp11         | -2.469              | > -2       |
| 1416576_at        | Socs3         | 2.275               | <2         | 1450350_a_at      | Jdp2          | -2.525              | > -2       |
| 1421411_at        | Pstpip2       | 2.273               | <2         | 1441926_x_at      | Tmie          | -2.576              | > -2       |
| 1446537_at        | ---           | 2.269               | <2         | 1415996_at        | Txnip         | -2.587              | > -2       |
| 1418471_at        | Pgf           | 2.262               | <2         | 1456404_at        | LOC100048332  | -2.596              | > -2       |
| 1424022_at        | Osgin1        | 2.259               | <2         | 1434089_at        | Synpo         | -2.647              | > -2       |
| 1440293_at        | C230081A13Rik | 2.247               | <2         | 1422561_at        | LOC100048332  | -2.735              | > -2       |
| 1452283_at        | Rassf8        | 2.247               | <2         | 1418595_at        | S3-12         | -2.779              | > -2       |
| 1433555_at        | Eaf1          | 2.245               | 2.260      | 1439831_at        | ---           | -2.894              | > -2       |
| 1418936_at        | Maff          | 2.239               | 2.083      | 1428416_at        | 3110050N22Rik | -2.928              | > -2       |
| 1448961_at        | Plscr2        | 2.217               | <2         | 1416855_at        | Gas1          | -2.936              | > -2       |
| 1420150_at        | Spsb1         | 2.212               | <2         | 1433783_at        | Ldb3          | -3.112              | > -2       |
| 1428777_at        | Spred1        | 2.190               | <2         | 1451905_a_at      | Mx1           | -3.243              | > -2       |
| 1448890_at        | Klf2          | 2.178               | 4.526      | 1416630_at        | Id3           | -3.548              | > -2       |
| 1451069_at        | Pim3          | 2.163               | <2         | 1448494_at        | Gas1          | -3.662              | > -2       |
| 1439291_at        | ---           | 2.162               | <2         | 1426858_at        | LOC100046802  | -3.890              | > -2       |

| FGF2 8h treatment |               | average fold change |            | FGF2 8h treatment |               | average fold change |            |
|-------------------|---------------|---------------------|------------|-------------------|---------------|---------------------|------------|
| Probe ID          | Gene symbol   | FGF2                | FGF2+U0126 | Probe ID          | Gene symbol   | FGF2                | FGF2+U0126 |
| 1431936_a_at      | Neu2          | 33.63               | 5.865      | 1426806_at        | Obfc2a        | 4.46                | <2         |
| 1456344_at        | Tnc           | 33.585              | <2         | 1458241_at        | ---           | 4.455               | 3.625      |
| 1426037_a_at      | Rgs16         | 31.715              | 13.18      | 1452160_at        | Tiparp        | 4.325               | 4.44       |
| 1421134_at        | Areg          | 20.505              | 3.515      | 1416200_at        | Il33          | 4.295               | <2         |
| 1437199_at        | ---           | 14.845              | 4.295      | 1451538_at        | Sox9          | 4.295               | 2.15       |
| 1449982_at        | Il11          | 11.825              | <2         | 1428834_at        | Dusp4         | 4.29                | <2         |
| 1418350_at        | Hbegf         | 10.935              | 3.885      | 1445001_at        | ---           | 4.245               | <2         |
| 1417995_at        | Wwtr1         | 10.065              | 3.46       | 1448562_at        | Upp1          | 4.245               | <2         |
| 1415834_at        | Dusp6         | 8.925               | 2.745      | 1416273_at        | Tnfaip2       | 4.2                 | 2.645      |
| 1418540_a_at      | Ptpre         | 8.705               | 2.97       | 1452161_at        | Tiparp        | 4.16                | 4.145      |
| 1451452_a_at      | Rgs16         | 8.5                 | <2         | 1443720_s_at      | Bmpr1b        | 4.155               | 2.645      |
| 1442350_at        | ---           | 8.035               | <2         | 1435108_at        | Arhgap22      | 4.145               | 2.81       |
| 1435554_at        | Tmcc3         | 7.845               | 2.74       | 1435174_at        | LOC100045795  | 4.145               | <2         |
| 1418349_at        | Hbegf         | 7.765               | 2.74       | 1449158_at        | Kcnk2         | 4.145               | <2         |
| 1440342_at        | G530011O06Rik | 7.535               | <2         | 1454889_x_at      | Tmcc3         | 4.06                | <2         |
| 1418539_a_at      | Ptpre         | 7.315               | 3.14       | 1452203_at        | Obfc2a        | 4.01                | 2.3        |
| 1434025_at        | ---           | 7.25                | 3.81       | 1451021_a_at      | Klf5          | 3.96                | <2         |
| 1443745_s_at      | Dmp1          | 7.07                | <2         | 1422053_at        | Inhba         | 3.92                | <2         |
| 1450781_at        | Hmga2         | 6.595               | 3.92       | 1450780_s_at      | Hmga2         | 3.87                | 2.695      |
| 1451798_at        | Il1rn         | 6.145               | <2         | 1420420_at        | Hao1          | 3.865               | <2         |
| 1449826_a_at      | Fgf2          | 6.12                | <2         | 1439747_at        | Ptges         | 3.865               | 2.39       |
| 1423933_a_at      | 1600029D21Rik | 6.08                | 3.605      | 1438148_at        | Cxcl3         | 3.81                | <2         |
| 1438824_at        | Slc20a1       | 6                   | 2.485      | 1455649_at        | Ttc9          | 3.81                | <2         |
| 1435645_at        | LOC676546     | 5.71                | 3.605      | 1419675_at        | Ngf           | 3.78                | <2         |
| 1436584_at        | Spry2         | 5.71                | 2.83       | 1422851_at        | Hmga2         | 3.78                | 3.015      |
| 1455604_at        | Fzd5          | 5.67                | 2.745      | 1443088_at        | 9930031P18Rik | 3.78                | <2         |
| 1437270_a_at      | Clcf1         | 5.47                | <2         | 1450241_a_at      | Evi2a         | 3.77                | 2.22       |
| 1443394_at        | ---           | 5.395               | 4.46       | 1436237_at        | Ttc9          | 3.73                | <2         |
| 1453055_at        | Sema6d        | 5.395               | <2         | 1427932_s_at      | 1200003110Rik | 3.69                | <2         |
| 1450262_at        | Clcf1         | 5.325               | <2         | 1423488_at        | Mmd           | 3.66                | 3          |
| 1439667_at        | ---           | 5.245               | <2         | 1443859_at        | LOC100045795  | 3.66                | <2         |
| 1437271_at        | Clcf1         | 5.175               | <2         | 1422444_at        | Itga6         | 3.61                | <2         |
| 1423017_a_at      | Il1rn         | 5.115               | <2         | 1430726_at        | Rassf8        | 3.61                | <2         |
| 1419431_at        | Ereg          | 5.1                 | <2         | 1439925_at        | ---           | 3.605               | <2         |
| 1455257_at        | Itgb3         | 5.03                | <2         | 1435137_s_at      | 1200015M12Rik | 3.56                | <2         |
| 1420352_at        | Prss22        | 4.99                | <2         | 1450627_at        | Ank           | 3.56                | <2         |
| 1424950_at        | Sox9          | 4.975               | <2         | 1426721_s_at      | Tiparp        | 3.515               | 3.74       |
| 1423489_at        | LOC100047565  | 4.895               | 4.245      | 1460521_a_at      | Obfc2a        | 3.515               | 2.485      |
| 1434285_at        | Frmf4a        | 4.895               | 2.855      | 1433455_at        | LOC100047863  | 3.49                | <2         |
| 1419647_a_at      | Ier3          | 4.83                | 3.865      | 1441481_at        | Mfap3l        | 3.48                | <2         |
| 1446196_at        | Hmga2         | 4.655               | 3.885      | 1435695_a_at      | Ggct          | 3.415               | <2         |
| 1416342_at        | Tnc           | 4.605               | <2         | 1446537_at        | ---           | 3.415               | <2         |
| 1448568_a_at      | Slc20a1       | 4.605               | <2         | 1434369_a_at      | Cryab         | 3.38                | 4          |
| 1450698_at        | Dusp2         | 4.605               | <2         | 1459981_s_at      | LOC100045795  | 3.38                | <2         |

| FGF2 8h treatment |               | average fold change |            | FGF2 8h treatment |               | average fold change |            |
|-------------------|---------------|---------------------|------------|-------------------|---------------|---------------------|------------|
| Probe ID          | Gene symbol   | FGF2                | FGF2+U0126 | Probe ID          | Gene symbol   | FGF2                | FGF2+U0126 |
| 1448789_at        | Aldh1a3       | 3.375               | <2         | 1441228_at        | Apold1        | 2.93                | <2         |
| 1424246_a_at      | Tes           | 3.365               | <2         | 1450070_s_at      | Pak1          | 2.93                | <2         |
| 1438350_at        | Gpr64         | 3.365               | <2         | 1455876_at        | Slc4a7        | 2.93                | <2         |
| 1453607_at        | Mfap3l        | 3.365               | <2         | 1435994_at        | Kcnh1         | 2.89                | <2         |
| 1426597_s_at      | Iffo2         | 3.32                | <2         | 1453238_s_at      | 1200016E24Rik | 2.89                | <2         |
| 1434469_at        | Otud4         | 3.32                | <2         | 1416592_at        | Glrx          | 2.855               | <2         |
| 1422040_at        | Sema7a        | 3.295               | <2         | 1428804_at        | Mfap3l        | 2.855               | 2          |
| 1435455_at        | Iffo2         | 3.28                | <2         | 1434210_s_at      | Lrig1         | 2.855               | <2         |
| 1423161_s_at      | Spred1        | 3.255               | <2         | 1418471_at        | Pgf           | 2.835               | <2         |
| 1438855_x_at      | Tnfaip2       | 3.255               | 2.485      | 1434967_at        | Zswim6        | 2.835               | <2         |
| 1425745_a_at      | Tacc2         | 3.25                | <2         | 1435580_at        | C230081A13Rik | 2.835               | <2         |
| 1452521_a_at      | Plaur         | 3.25                | 2.38       | 1449449_at        | Ptges         | 2.835               | <2         |
| 1456945_at        | Nudt6         | 3.25                | <2         | 1453581_at        | Cep170        | 2.835               | <2         |
| 1459681_at        | ---           | 3.25                | <2         | 1457528_at        | Slc4a7        | 2.835               | <2         |
| 1418726_a_at      | Tnnt2         | 3.185               | <2         | 1422573_at        | Ampd3         | 2.83                | 2.22       |
| 1444010_at        | Eif4e         | 3.185               | <2         | 1433555_at        | Eaf1          | 2.83                | <2         |
| 1441789_at        | ---           | 3.155               | <2         | 1459903_at        | Sema7a        | 2.83                | <2         |
| 1449450_at        | Ptges         | 3.155               | 2          | 1435867_at        | Jhdm1d        | 2.81                | <2         |
| 1421207_at        | Lif           | 3.15                | <2         | 1418945_at        | Mmp3          | 2.775               | <2         |
| 1450183_a_at      | LOC100047863  | 3.15                | <2         | 1428777_at        | Spred1        | 2.775               | <2         |
| 1418507_s_at      | Socs2         | 3.145               | <2         | 1423162_s_at      | Spred1        | 2.745               | <2         |
| 1433110_at        | 5830474E16Rik | 3.145               | <2         | 1425663_at        | Il1rn         | 2.745               | <2         |
| 1417751_at        | Stk10         | 3.14                | <2         | 1434737_at        | Obfc1         | 2.745               | 2.32       |
| 1439104_at        | C230081A13Rik | 3.14                | <2         | 1449227_at        | Ch25h         | 2.745               | 2.22       |
| 1443894_at        | Evi2a         | 3.14                | <2         | 1426600_at        | Slc2a1        | 2.735               | <2         |
| 1435640_x_at      | A130040M12Rik | 3.095               | <2         | 1427683_at        | Egr2          | 2.735               | <2         |
| 1449893_a_at      | Lrig1         | 3.095               | 2.07       | 1438672_at        | Parvb         | 2.735               | <2         |
| 1437820_at        | Foxs1         | 3.06                | <2         | 1455448_at        | Dagla         | 2.735               | <2         |
| 1450958_at        | Tm4sf1        | 3.06                | <2         | 1460378_a_at      | Tes           | 2.735               | <2         |
| 1439327_at        | Ccbe1         | 3.04                | 2          | 1436729_at        | Afap1         | 2.695               | <2         |
| 1424967_x_at      | Tnnt2         | 3.03                | <2         | 1456543_at        | Prokr1        | 2.695               | <2         |
| 1428081_at        | Klh21         | 3.03                | <2         | 1418546_a_at      | Stambpl1      | 2.665               | <2         |
| 1416593_at        | Glrx          | 3.015               | <2         | 1419083_at        | Tnfsf11       | 2.665               | <2         |
| 1422445_at        | Itga6         | 3.015               | <2         | 1423905_at        | Pvr           | 2.665               | 2.485      |
| 1436329_at        | Egr3          | 3.015               | <2         | 1445837_at        | ---           | 2.665               | <2         |
| 1417262_at        | Ptgs2         | 2.97                | 2.855      | 1417263_at        | Ptgs2         | 2.645               | 2.22       |
| 1424890_at        | Bnc1          | 2.97                | <2         | 1417409_at        | Jun           | 2.645               | <2         |
| 1450129_a_at      | Socs6         | 2.97                | <2         | 1423160_at        | Spred1        | 2.645               | <2         |
| 1426875_s_at      | Srxn1         | 2.945               | <2         | 1440999_at        | Zfp697        | 2.645               | <2         |
| 1430623_s_at      | Obfc2a        | 2.945               | <2         | 1448694_at        | Jun           | 2.645               | <2         |
| 1437312_at        | Bmpr1b        | 2.945               | <2         | 1418835_at        | Phlda1        | 2.64                | 2.22       |
| 1456150_at        | Jhdm1d        | 2.945               | <2         | 1423904_a_at      | Pvr           | 2.64                | 2.47       |
| 1420979_at        | Pak1          | 2.93                | <2         | 1438673_at        | Slc4a7        | 2.64                | <2         |
| 1425351_at        | Srxn1         | 2.93                | <2         | 1440053_at        | ---           | 2.64                | <2         |

| FGF2 8h treatment |               | average fold change |            | FGF2 8h treatment |               | average fold change |            |
|-------------------|---------------|---------------------|------------|-------------------|---------------|---------------------|------------|
| Probe ID          | Gene symbol   | FGF2                | FGF2+U0126 | Probe ID          | Gene symbol   | FGF2                | FGF2+U0126 |
| 1457782_at        | Tln1          | 2.64                | <2         | 1426235_a_at      | Glul          | 2.415               | 2.625      |
| 1426599_a_at      | Slc2a1        | 2.585               | 2.23       | 1428579_at        | Fmnl2         | 2.415               | <2         |
| 1417256_at        | Mmp13         | 2.565               | <2         | 1428936_at        | Atp2b1        | 2.415               | <2         |
| 1428142_at        | Etv5          | 2.565               | <2         | 1431681_at        | Klk9          | 2.415               | <2         |
| 1431039_at        | Otud4         | 2.565               | <2         | 1434773_a_at      | Slc2a1        | 2.415               | <2         |
| 1440796_at        | A330021E22Rik | 2.565               | <2         | 1418936_at        | Maff          | 2.39                | <2         |
| 1446503_at        | ---           | 2.565               | <2         | 1420980_at        | Pak1          | 2.39                | <2         |
| 1451680_at        | Srxn1         | 2.565               | <2         | 1425145_at        | Il1rl1        | 2.39                | <2         |
| 1418084_at        | Nrp1          | 2.55                | <2         | 1437486_at        | Gprc5a        | 2.39                | <2         |
| 1418148_at        | Abhd1         | 2.55                | <2         | 1448944_at        | Nrp1          | 2.39                | <2         |
| 1419677_at        | Masp1         | 2.55                | <2         | 1450650_at        | Myo10         | 2.39                | 2.3        |
| 1424891_a_at      | Zw10          | 2.55                | <2         | 1455859_at        | A330021E22Rik | 2.39                | <2         |
| 1437404_at        | Mast4         | 2.55                | <2         | 1459749_s_at      | Fat4          | 2.39                | <2         |
| 1443558_s_at      | Nt5dc3        | 2.55                | <2         | 1419169_at        | Mapk6         | 2.38                | <2         |
| 1445866_at        | Mast4         | 2.55                | 2.07       | 1420590_at        | Has1          | 2.38                | <2         |
| 1446850_at        | ---           | 2.55                | <2         | 1422612_at        | Hk2           | 2.38                | 2.23       |
| 1450295_s_at      | Pvr           | 2.55                | 2.645      | 1423903_at        | Pvr           | 2.38                | <2         |
| 1451944_a_at      | Tnfsf11       | 2.55                | <2         | 1424704_at        | Runx2         | 2.38                | <2         |
| 1457465_at        | Shroom4       | 2.55                | <2         | 1429053_at        | 1110012J17Rik | 2.38                | <2         |
| 1458802_at        | Hivep3        | 2.55                | <2         | 1432757_at        | 2900011L18Rik | 2.38                | <2         |
| 1416455_a_at      | Cryab         | 2.515               | 3.625      | 1433465_a_at      | Al467606      | 2.38                | <2         |
| 1422317_a_at      | Il1rl1        | 2.515               | <2         | 1435777_at        | Itpripl2      | 2.38                | <2         |
| 1418661_at        | Abhd2         | 2.485               | <2         | 1452058_a_at      | Rnf11         | 2.38                | <2         |
| 1421031_a_at      | 2310016C08Rik | 2.485               | <2         | 1452483_a_at      | Cd44          | 2.38                | 2.15       |
| 1428419_at        | 5430411K18Rik | 2.485               | <2         | 1453181_x_at      | Plscr1        | 2.38                | <2         |
| 1428509_at        | Myo1e         | 2.485               | <2         | 1457587_at        | Kcnaq5        | 2.38                | <2         |
| 1453092_at        | Crct1         | 2.485               | <2         | 1427682_a_at      | Egr2          | 2.32                | <2         |
| 1456248_at        | Lce3f         | 2.485               | <2         | 1441794_at        | ---           | 2.32                | <2         |
| 1416871_at        | Adam8         | 2.47                | <2         | 1455214_at        | Mitf          | 2.32                | <2         |
| 1417065_at        | Egr1          | 2.47                | <2         | 1417697_at        | Soat1         | 2.3                 | <2         |
| 1420150_at        | Spsb1         | 2.47                | <2         | 1423349_at        | Socs5         | 2.3                 | <2         |
| 1433617_s_at      | B4galt5       | 2.47                | <2         | 1428420_a_at      | 1200009I06Rik | 2.3                 | 2.15       |
| 1434447_at        | Met           | 2.47                | <2         | 1433920_at        | Sema4c        | 2.3                 | <2         |
| 1449976_a_at      | Gpr35         | 2.47                | <2         | 1434639_at        | Klhl29        | 2.3                 | <2         |
| 1416693_at        | Foxc2         | 2.46                | <2         | 1434958_at        | Sacs          | 2.3                 | <2         |
| 1419112_at        | Nlk           | 2.46                | <2         | 1436026_at        | Zfp703        | 2.3                 | <2         |
| 1426478_at        | Rasa1         | 2.46                | <2         | 1437100_x_at      | Pim3          | 2.3                 | <2         |
| 1435880_at        | Ankrd50       | 2.46                | <2         | 1437155_a_at      | Wwtr1         | 2.3                 | <2         |
| 1437154_at        | Cep170        | 2.46                | <2         | 1437447_s_at      | Ercc1         | 2.3                 | <2         |
| 1445882_at        | Cd300lb       | 2.46                | <2         | 1448961_at        | Plscr2        | 2.3                 | <2         |
| 1451819_at        | Zswim6        | 2.46                | <2         | 1451584_at        | Havcr2        | 2.3                 | <2         |
| 1452151_at        | Gramd4        | 2.46                | <2         | 1452469_a_at      | Smtn          | 2.3                 | <2         |
| 1455405_at        | Pstpip2       | 2.46                | <2         | 1452764_at        | Socs6         | 2.3                 | <2         |
| 1424528_at        | Cgref1        | 2.415               | <2         | 1455181_at        | Rasa2         | 2.3                 | <2         |

| FGF2 8h treatment     |             | average fold change |            | FGF2 8h treatment |               | average fold change |            |
|-----------------------|-------------|---------------------|------------|-------------------|---------------|---------------------|------------|
| Probe ID              | Gene symbol | FGF2                | FGF2+U0126 | Probe ID          | Gene symbol   | FGF2                | FGF2+U0126 |
| 1418403_at            | Adam19      | 2.23                | <2         | 1449249_at        | Pcdh7         | 2.07                | <2         |
| 1419816_s_at          | Gabpb1      | 2.23                | <2         | 1451959_a_at      | Vegfa         | 2.07                | <2         |
| 1420498_a_at          | Dab2        | 2.23                | <2         | 1454731_at        | Myo10         | 2.07                | <2         |
| 1436359_at            | Ret         | 2.23                | <2         | 1457561_at        | Itga5         | 2.07                | <2         |
| 1438740_at            | Nmt2        | 2.23                | <2         | 1423267_s_at      | Itga5         | 2                   | <2         |
| 1440827_x_at          | Sox5        | 2.23                | <2         | 1443230_at        | ---           | 2                   | <2         |
| 18SRNAMur/X00686_M_at | ---         | 2.23                | <2         | 1448908_at        | Ppap2b        | 2                   | <2         |
| 1424529_s_at          | Cgref1      | 2.22                | <2         | 1458440_at        | Cytsb         | 2                   | <2         |
| 1426405_at            | Rnf11       | 2.22                | <2         | 1417644_at        | Sspn          | -2                  | >-2        |
| 1428853_at            | Ptch1       | 2.22                | <2         | 1425416_s_at      | Psrc1         | -2                  | >-2        |
| 1429527_a_at          | Plscr1      | 2.22                | <2         | 1454965_at        | ---           | -2                  | >-2        |
| 1434468_at            | Otud4       | 2.22                | <2         | 1416309_at        | Nusap1        | -2.07               | >-2        |
| 1441896_x_at          | ---         | 2.22                | <2         | 1417148_at        | Pdgfrb        | -2.07               | >-2        |
| 1449336_a_at          | Slk         | 2.22                | <2         | 1419467_at        | Clec14a       | -2.07               | -2.22      |
| 1450744_at            | Ell2        | 2.22                | <2         | 1426734_at        | Fam43a        | -2.07               | >-2        |
| 1451160_s_at          | Pvr         | 2.22                | 2.15       | 1434866_x_at      | Cpt1a         | -2.07               | >-2        |
| 1452163_at            | Ets1        | 2.22                | <2         | 1437132_x_at      | Nedd9         | -2.07               | >-2        |
| 1459722_at            | Zswim6      | 2.22                | <2         | 1435280_at        | Al452195      | -2.14               | >-2        |
| 1417328_at            | Ercc1       | 2.15                | <2         | 1454862_at        | Phldb2        | -2.14               | >-2        |
| 1417612_at            | Ier5        | 2.15                | <2         | 1427640_a_at      | Runx1t1       | -2.15               | >-2        |
| 1417817_a_at          | Irgm2       | 2.15                | <2         | 1428025_s_at      | Pitpnc1       | -2.15               | >-2        |
| 1418402_at            | Adam19      | 2.15                | <2         | 1448167_at        | Ifngr1        | -2.15               | >-2        |
| 1419717_at            | Sema3e      | 2.15                | <2         | 1456643_at        | 9230114K14Rik | -2.15               | >-2        |
| 1426708_at            | Antxr2      | 2.15                | <2         | 1417133_at        | Pmp22         | -2.22               | >-2        |
| 1427313_at            | Ptgir       | 2.15                | <2         | 1437303_at        | Il6st         | -2.22               | >-2        |
| 1434082_at            | Pctk2       | 2.15                | <2         | 1457266_at        | ---           | -2.22               | >-2        |
| 1437396_at            | Creb3l2     | 2.15                | <2         | 1418930_at        | Cxcl10        | -2.23               | -2.625     |
| 1455678_at            | Sema4b      | 2.15                | <2         | 1417394_at        | Klf4          | -2.3                | >-2        |
| 1460565_at            | Slc41a1     | 2.15                | <2         | 1422433_s_at      | Idh1          | -2.3                | >-2        |
| 1421843_at            | Il1rap      | 2.14                | <2         | 1427277_at        | Six1          | -2.3                | >-2        |
| 1424289_at            | Osgin2      | 2.14                | <2         | 1436244_a_at      | Tle2          | -2.3                | >-2        |
| 1425526_a_at          | Prrx1       | 2.14                | <2         | 1443897_at        | Ddit3         | -2.3                | >-2        |
| 1431592_a_at          | Sh3kbp1     | 2.14                | <2         | 1415984_at        | Acadm         | -2.32               | >-2        |
| 1434887_at            | Freq        | 2.14                | <2         | 1453058_at        | Wdr5b         | -2.32               | -2.15      |
| 1437385_at            | Ccbe1       | 2.14                | <2         | 1452387_a_at      | Amotl2        | -2.38               | >-2        |
| 1448026_at            | Chd7        | 2.14                | <2         | 1452843_at        | Il6st         | -2.38               | >-2        |
| 1449865_at            | Sema3a      | 2.14                | <2         | 1422970_at        | Mxd3          | -2.39               | >-2        |
| 1451069_at            | Pim3        | 2.14                | <2         | 1431074_a_at      | Pitpnc1       | -2.39               | >-2        |
| 1460574_at            | Fat4        | 2.14                | <2         | 1438156_x_at      | Cpt1a         | -2.39               | >-2        |
| 1419722_at            | Klk8        | 2.07                | <2         | 1448669_at        | Dkk3          | -2.39               | >-2        |
| 1426404_a_at          | Rnf11       | 2.07                | <2         | 1417516_at        | Ddit3         | -2.415              | >-2        |
| 1432189_a_at          | Sox5        | 2.07                | <2         | 1437247_at        | Fosl2         | -2.415              | >-2        |
| 1435492_at            | Socs6       | 2.07                | <2         | 1450923_at        | Tgfb2         | -2.415              | >-2        |
| 1442760_x_at          | ---         | 2.07                | <2         | 1418400_at        | Larp6         | -2.46               | >-2        |

| FGF2 8h treatment |               | average fold change |            | FGF2 8h treatment |              | average fold change |            |
|-------------------|---------------|---------------------|------------|-------------------|--------------|---------------------|------------|
| Probe ID          | Gene symbol   | FGF2                | FGF2+U0126 | Probe ID          | Gene symbol  | FGF2                | FGF2+U0126 |
| 1421917_at        | Pdgfra        | -2.47               | > -2       | 1460229_at        | Stag3        | -3.56               | -3.095     |
| 1421923_at        | Sh3bp5        | -2.485              | > -2       | 1416612_at        | Cyp1b1       | -3.605              | > -2       |
| 1424029_at        | Tspyl4        | -2.485              | > -2       | 1420349_at        | Ptgr         | -3.605              | -2.55      |
| 1424354_at        | Tmem140       | -2.485              | > -2       | 1433444_at        | Hmgcs1       | -3.66               | > -2       |
| 1419584_at        | Ttc28         | -2.515              | > -2       | 1433445_x_at      | Hmgcs1       | -3.66               | > -2       |
| 1435456_at        | Ttc28         | -2.515              | > -2       | 1417234_at        | Mmp11        | -3.77               | > -2       |
| 1453851_a_at      | Gadd45g       | -2.515              | > -2       | 1433443_a_at      | Hmgcs1       | -3.77               | > -2       |
| 1420858_at        | Pkia          | -2.55               | > -2       | 1416318_at        | Serpinb1a    | -3.78               | > -2       |
| 1430596_s_at      | Vgll3         | -2.55               | > -2       | 1417546_at        | Il2rb        | -3.79               | -2.81      |
| 1433446_at        | Hmgcs1        | -2.55               | > -2       | 1446326_at        | Col1a2       | -3.81               | > -2       |
| 1450857_a_at      | Col1a2        | -2.55               | > -2       | 1416806_at        | Fdxr         | -3.96               | > -2       |
| 1453593_at        | Vgll3         | -2.55               | > -2       | 1416613_at        | Cyp1b1       | -4                  | > -2       |
| 1416825_at        | Snta1         | -2.565              | > -2       | 1422561_at        | Adamts5      | -4.1                | > -2       |
| 1454699_at        | LOC100047324  | -2.585              | > -2       | 1441389_at        | ---          | -4.155              | > -2       |
| 1423250_a_at      | Tgfb2         | -2.665              | -2.46      | 1448759_at        | Il2rb        | -4.155              | -2.81      |
| 1429637_at        | 1110032E23Rik | -2.665              | > -2       | 1426858_at        | Inhbb        | -4.16               | > -2       |
| 1434151_at        | Mettl7a1      | -2.665              | > -2       | 1423110_at        | Col1a2       | -4.2                | > -2       |
| 1451479_a_at      | Tmem53        | -2.735              | > -2       | 1428418_s_at      | Fam164a      | -4.44               | > -2       |
| 1451989_a_at      | Mapre2        | -2.735              | > -2       | 1427884_at        | Col3a1       | -4.445              | > -2       |
| 1454858_x_at      | Mettl7a1      | -2.745              | > -2       | 1452244_at        | 633040615Rik | -4.505              | -3.625     |
| 1427347_s_at      | Tubb2a        | -2.775              | > -2       | 1451344_at        | Tmem119      | -4.55               | > -2       |
| 1418981_at        | Casp12        | -2.81               | -2         | 1450625_at        | Col5a2       | -4.71               | -2.22      |
| 1438084_at        | ---           | -2.83               | > -2       | 1418666_at        | Ptx3         | -4.875              | > -2       |
| 1446331_at        | Ptgr          | -2.83               | -2.415     | 1428417_at        | Fam164a      | -4.935              | > -2       |
| 1434150_a_at      | Higd1c        | -2.93               | > -2       | 1416630_at        | Id3          | -4.99               | -3.015     |
| 1448785_at        | Runx1t1       | -2.93               | > -2       | 1419015_at        | Wisp2        | -5.125              | -2.835     |
| 1455299_at        | Vgll3         | -2.93               | > -2       | 1421289_at        | Hspb7        | -5.125              | > -2       |
| 1419872_at        | Csf1r         | -2.935              | > -2       | 1433653_at        | Fam20a       | -5.48               | > -2       |
| 1435106_at        | Limch1        | -2.935              | > -2       | 1426937_at        | 633040615Rik | -5.595              | -3.77      |
| 1416926_at        | Trp53inp1     | -3.015              | > -2       | 1428416_at        | Fam164a      | -5.71               | -2.14      |
| 1420859_at        | Pkia          | -3.06               | > -2       | 1443937_at        | ---          | -5.73               | -3.92      |
| 1438931_s_at      | LOC100047324  | -3.06               | > -2       | 1448390_a_at      | Dhrs3        | -6.46               | -3.605     |
| 1439066_at        | Angpt1        | -3.06               | > -2       | 1455494_at        | Col1a1       | -6.74               | > -2       |
| 1438953_at        | Figf          | -3.095              | -2.38      | 1416855_at        | Gas1         | -7.74               | > -2       |
| 1450658_at        | Adamts5       | -3.145              | > -2       | 1418595_at        | Plin4        | -7.82               | > -2       |
| 1438954_x_at      | Figf          | -3.155              | > -2       | 1448494_at        | Gas1         | -8.76               | -6.83      |
| 1441536_at        | Hmgcs1        | -3.155              | > -2       | 1433783_at        | Ldb3         | -11.475             | -2         |
| 1444615_x_at      | Runx1t1       | -3.185              | > -2       | 1439505_at        | Clic5        | -16.24              | > -2       |
| 1456404_at        | Adamts5       | -3.215              | > -2       |                   |              |                     |            |
| 1418288_at        | Lpin1         | -3.365              | > -2       |                   |              |                     |            |
| 1434927_at        | Hspb7         | -3.365              | > -2       |                   |              |                     |            |
| 1450344_a_at      | Ptger3        | -3.365              | > -2       |                   |              |                     |            |
| 1438211_s_at      | Dbp           | -3.415              | > -2       |                   |              |                     |            |
| 1418174_at        | Dbp           | -3.53               | -2.39      |                   |              |                     |            |
